# Supplementary figures and images for: Generation and structural characterization of Ge carbides GeCn (n = 4, 5, 6) by laser ablation, broadband rotational spectroscopy, and quantum chemistry
Source: Royal Society of Chemistry journal article supplement (doi:10.1039/c9cp03607e), 2019-01-01

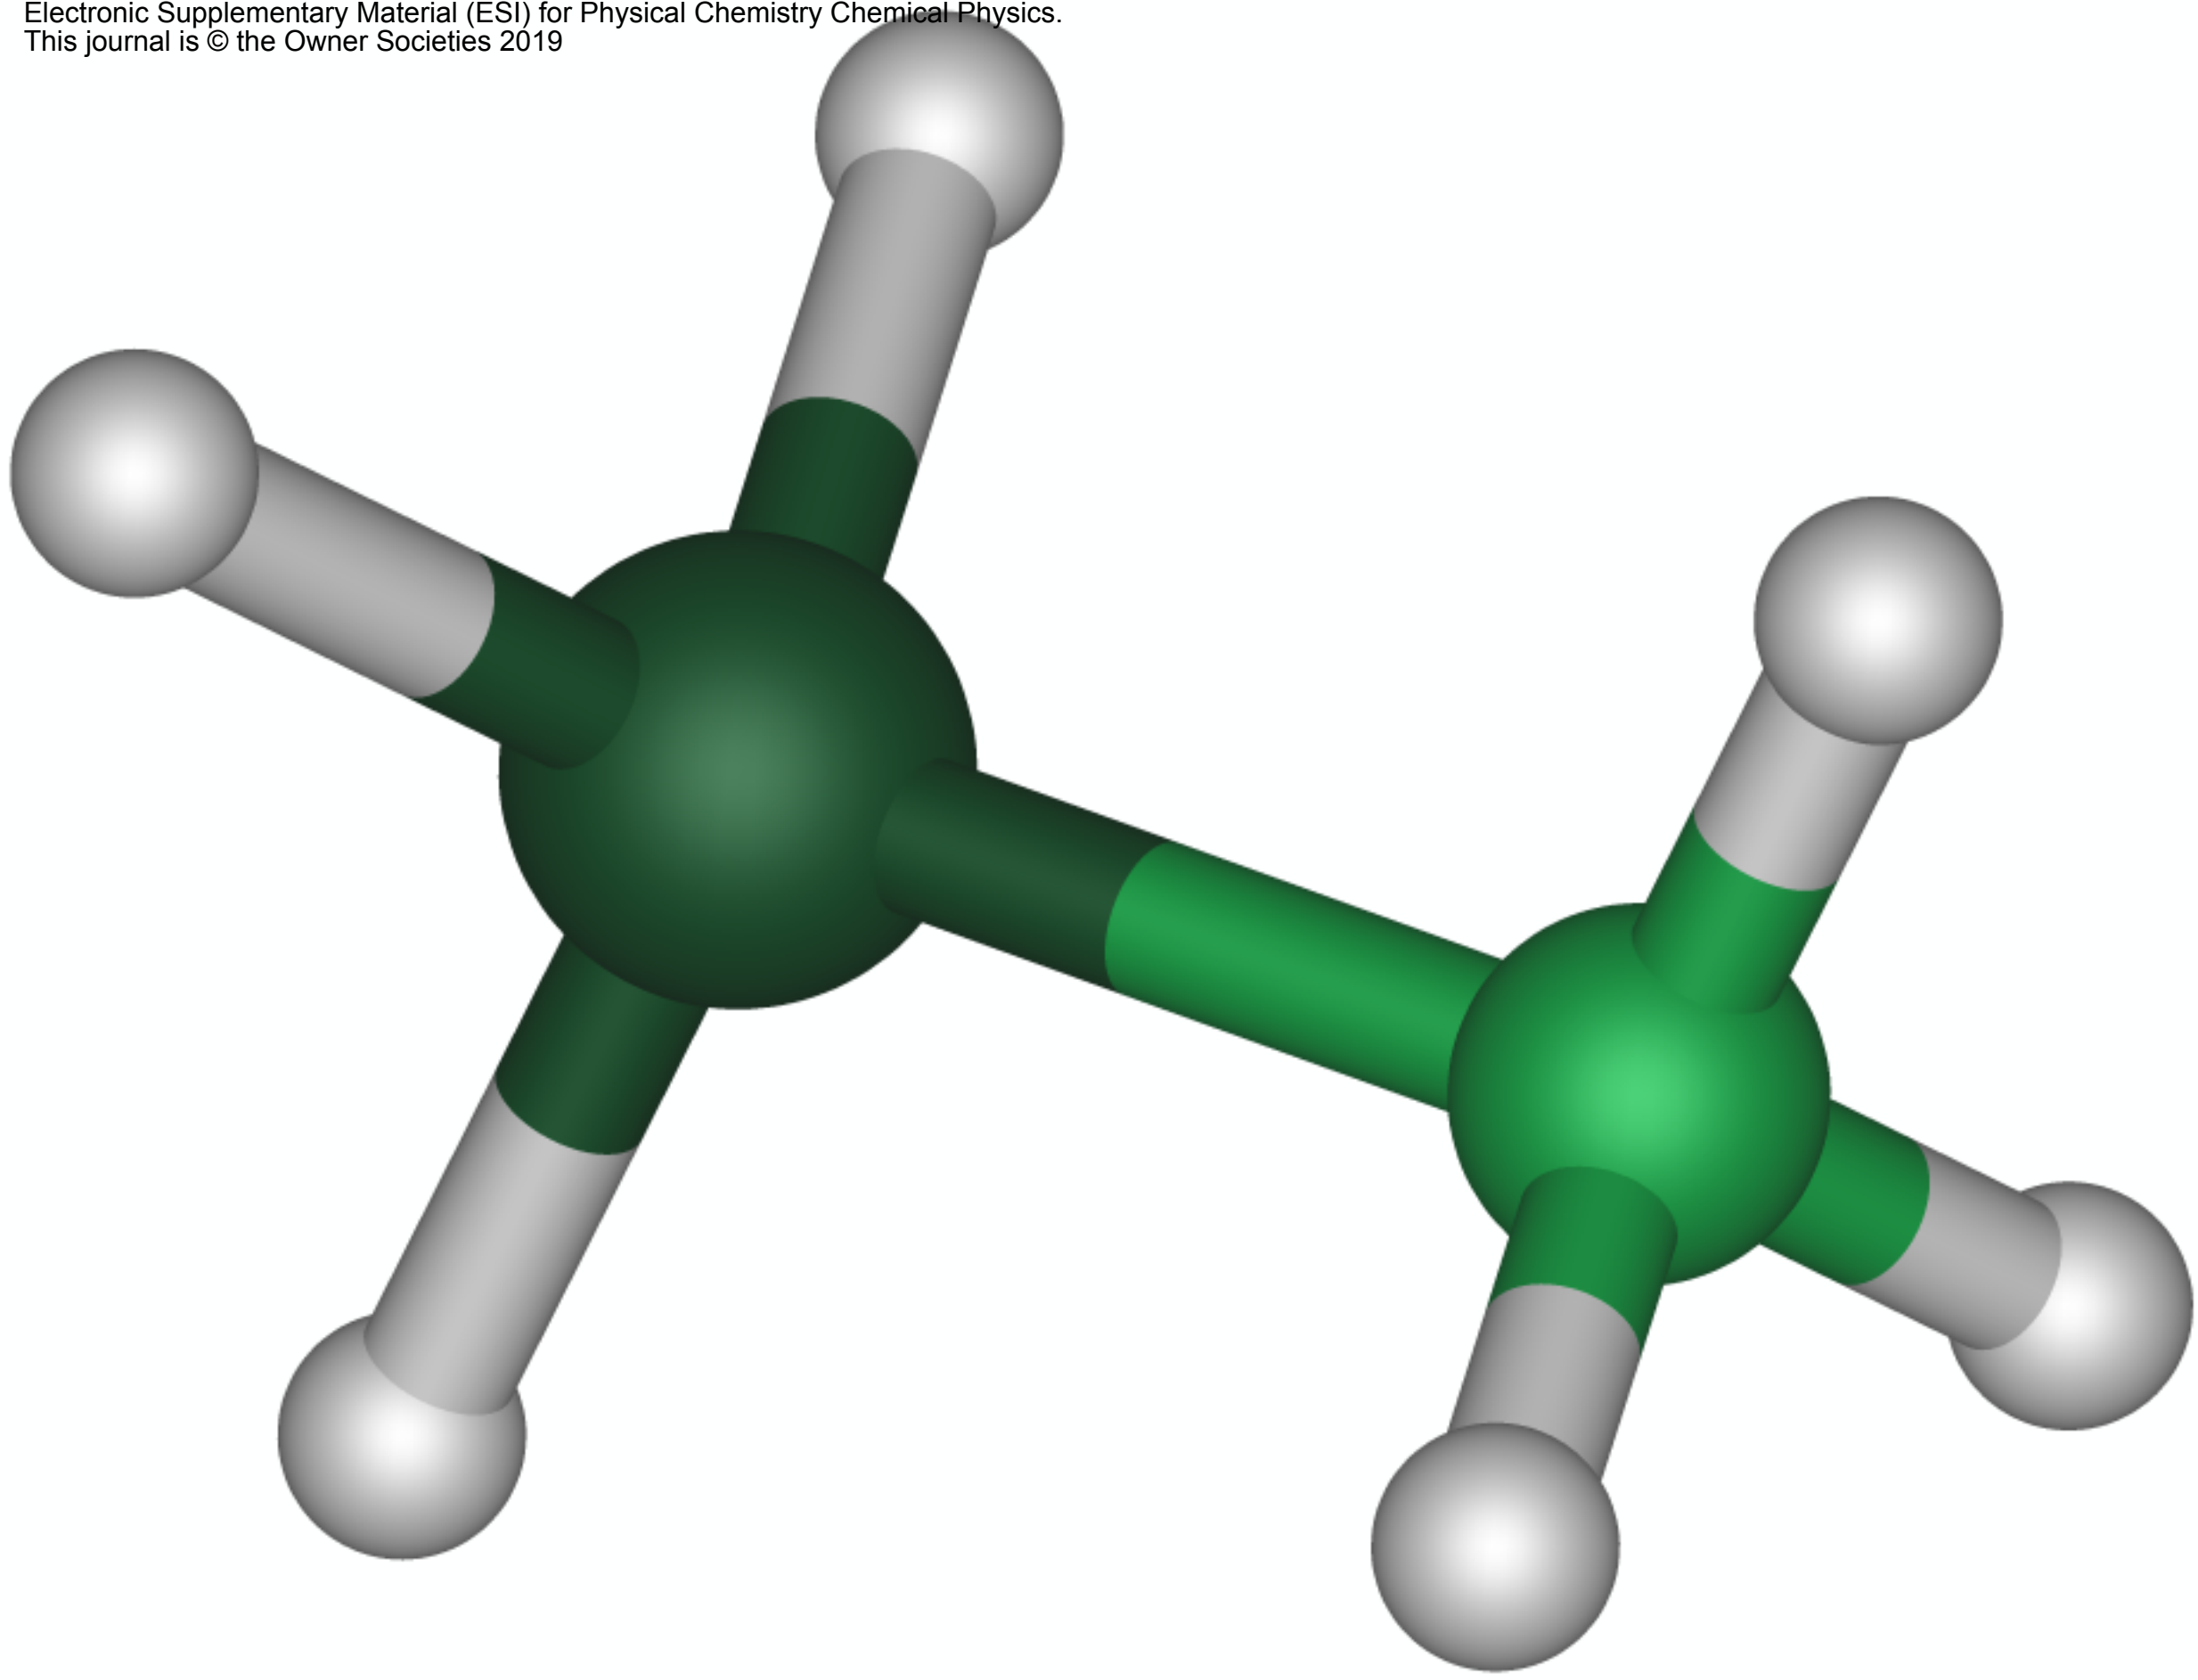

Supplement: c9cp03607e2.pdf [file c9cp03607e2.pdf]
